# Supplementary material
Source: publisher figshare collection journal article supplement (https://acs.figshare.com/ndownloader/files/4764661)
Supplement: Supplementary file 1 [file 4764661]

 
data_mn1760 
 
_audit_creation_method            SHELXL-97 
_chemical_name_systematic 
; 
 ? 
; 
_chemical_name_common             'Rh~2~(O~2~CR)~4~(H~2~O)~2~, R=CH~2~CH~2~Cl'
_chemical_melting_point           ? 
_chemical_formula_moiety          ? 
_chemical_formula_sum 
 'C12 H18 Cl4 O10 Rh2' 
_chemical_formula_weight          669.88 
 
loop_ 
 _atom_type_symbol 
 _atom_type_description 
 _atom_type_scat_dispersion_real 
 _atom_type_scat_dispersion_imag 
 _atom_type_scat_source 
 'C'  'C'   0.0033   0.0016 
 'International Tables Vol C Tables 4.2.6.8 and 6.1.1.4' 
 'H'  'H'   0.0000   0.0000 
 'International Tables Vol C Tables 4.2.6.8 and 6.1.1.4' 
 'O'  'O'   0.0106   0.0060 
 'International Tables Vol C Tables 4.2.6.8 and 6.1.1.4' 
 'Cl'  'Cl'   0.1484   0.1585 
 'International Tables Vol C Tables 4.2.6.8 and 6.1.1.4' 
 'Rh'  'Rh'  -1.1178   0.9187 
 'International Tables Vol C Tables 4.2.6.8 and 6.1.1.4' 
 
_symmetry_cell_setting            monoclinic 
_symmetry_space_group_name_H-M    'P 21/n' 
 
loop_ 
 _symmetry_equiv_pos_as_xyz 
 'x, y, z' 
 '-x+1/2, y+1/2, -z+1/2' 
 '-x, -y, -z' 
 'x-1/2, -y-1/2, z-1/2' 
 
_cell_length_a                    13.3174(17) 
_cell_length_b                    29.568(4) 
_cell_length_c                    21.286(3) 
_cell_angle_alpha                 90.00 
_cell_angle_beta                  90.295(6) 
_cell_angle_gamma                 90.00 
_cell_volume                      8381.6(19) 
_cell_formula_units_Z             16 
_cell_measurement_temperature     93(2) 
_cell_measurement_reflns_used     9268 
_cell_measurement_theta_min       2.25 
_cell_measurement_theta_max       31.5 
 
_exptl_crystal_description        block 
_exptl_crystal_colour             blue-green 
_exptl_crystal_size_max           0.24 
_exptl_crystal_size_mid           0.14 
_exptl_crystal_size_min           0.12 
_exptl_crystal_density_meas       ? 
_exptl_crystal_density_diffrn     2.123 
_exptl_crystal_density_method     'not measured' 
_exptl_crystal_F_000              5248 
_exptl_absorpt_coefficient_mu     2.132 
_exptl_absorpt_correction_type    multi-scan 
_exptl_absorpt_correction_T_min   0.629 
_exptl_absorpt_correction_T_max   0.784 
_exptl_absorpt_process_details    'SADABS 2.10 (Sheldrick, 2003)' 
 
_exptl_special_details 
; 
 ? 
; 
 
_diffrn_ambient_temperature       93(2) 
_diffrn_radiation_wavelength      0.71073 
_diffrn_radiation_type            MoK\a 
_diffrn_radiation_source          'fine-focus sealed tube' 
_diffrn_radiation_monochromator   graphite 
_diffrn_measurement_device_type   'Bruker Apex2' 
_diffrn_measurement_method        '\w and \f' 
_diffrn_detector_area_resol_mean  8.3 
_diffrn_standards_number          0 
_diffrn_standards_interval_count  ? 
_diffrn_standards_interval_time   ? 
_diffrn_standards_decay_%         ? 
_diffrn_reflns_number             142922 
_diffrn_reflns_av_R_equivalents   0.0582 
_diffrn_reflns_av_sigmaI/netI     0.0437 
_diffrn_reflns_limit_h_min        -19 
_diffrn_reflns_limit_h_max        19 
_diffrn_reflns_limit_k_min        -43 
_diffrn_reflns_limit_k_max        43 
_diffrn_reflns_limit_l_min        -30 
_diffrn_reflns_limit_l_max        31 
_diffrn_reflns_theta_min          1.68 
_diffrn_reflns_theta_max          31.55 
_reflns_number_total              27848 
_reflns_number_gt                 24235 
_reflns_threshold_expression      I>2\s(I) 
 
_computing_data_collection        'Bruker Apex2 (2005)'
_computing_cell_refinement        'Bruker SAINT (2005)' 
_computing_data_reduction         SAINT 
_computing_structure_solution     'SHELXS-97 (Sheldrick, 1990)' 
_computing_structure_refinement   'SHELXL97 (Sheldrick, 1997)' 
_computing_molecular_graphics     ? 
_computing_publication_material   SHELXL97 
 
_refine_special_details 
; 
 Refinement of F^2^ against ALL reflections.  The weighted R-factor wR and 
 goodness of fit S are based on F^2^, conventional R-factors R are based 
 on F, with F set to zero for negative F^2^. The threshold expression of 
 F^2^ > 2sigma(F^2^) is used only for calculating R-factors(gt) etc. and is 
 not relevant to the choice of reflections for refinement.  R-factors based 
 on F^2^ are statistically about twice as large as those based on F, and R- 
 factors based on ALL data will be even larger. 
The structure is a pseudo merohedral twin with twin law 1 0 0 0 -1 0 0 0 -1.
The twin parameter refined to 0.297. 
There are three dimers and two half-dimers in the asymmetric unit. Most of
the water H atoms were not located.
; 
 
_refine_ls_structure_factor_coef  Fsqd  
_refine_ls_matrix_type            full 
_refine_ls_weighting_scheme       calc  
_refine_ls_weighting_details 
 'calc w=1/[\s^2^(Fo^2^)+(0.0780P)^2^+90.0881P] where P=(Fo^2^+2Fc^2^)/3' 
_atom_sites_solution_primary      direct 
_atom_sites_solution_secondary    difmap 
_atom_sites_solution_hydrogens    geom 
_refine_ls_hydrogen_treatment     constr 
_refine_ls_extinction_method      none 
_refine_ls_extinction_coef        ? 
_refine_ls_number_reflns          27848 
_refine_ls_number_parameters      1034 
_refine_ls_number_restraints      12 
_refine_ls_R_factor_all           0.0709 
_refine_ls_R_factor_gt            0.0587 
_refine_ls_wR_factor_ref          0.1653 
_refine_ls_wR_factor_gt           0.1535 
_refine_ls_goodness_of_fit_ref    1.047 
_refine_ls_restrained_S_all       1.047 
_refine_ls_shift/su_max           0.004 
_refine_ls_shift/su_mean          0.000 
 
loop_ 
 _atom_site_label 
 _atom_site_type_symbol 
 _atom_site_fract_x 
 _atom_site_fract_y 
 _atom_site_fract_z 
 _atom_site_U_iso_or_equiv 
 _atom_site_adp_type 
 _atom_site_occupancy 
 _atom_site_symmetry_multiplicity 
 _atom_site_calc_flag 
 _atom_site_refinement_flags 
 _atom_site_disorder_assembly 
 _atom_site_disorder_group 
Rh1 Rh 0.54146(4) 0.220519(15) 0.49293(2) 0.01296(9) Uani 1 1 d . . . 
Rh2 Rh 0.45975(4) 0.287421(15) 0.52845(2) 0.01317(9) Uani 1 1 d . . . 
O1 O 0.5352(4) 0.24724(15) 0.4049(2) 0.0161(9) Uani 1 1 d . . . 
O2 O 0.4544(4) 0.30960(16) 0.4382(2) 0.0196(10) Uani 1 1 d . . . 
O3 O 0.5446(4) 0.19827(16) 0.5830(2) 0.0170(9) Uani 1 1 d . . . 
O4 O 0.4674(4) 0.26174(16) 0.6172(2) 0.0178(9) Uani 1 1 d . . . 
O5 O 0.6755(4) 0.25203(17) 0.5058(3) 0.0194(9) Uani 1 1 d . . . 
O6 O 0.5983(4) 0.31586(17) 0.5368(3) 0.0214(10) Uani 1 1 d . . . 
O7 O 0.4026(4) 0.19201(16) 0.4826(2) 0.0178(9) Uani 1 1 d . . . 
O8 O 0.3271(4) 0.25519(16) 0.5169(2) 0.0179(9) Uani 1 1 d . . . 
O9 O 0.6160(4) 0.15551(17) 0.4546(3) 0.0212(10) Uani 1 1 d D . . 
H9A H 0.613(7) 0.1286(14) 0.472(4) 0.025 Uiso 1 1 d D . . 
H9D H 0.649(7) 0.151(3) 0.419(3) 0.025 Uiso 1 1 d D . . 
O10 O 0.3810(4) 0.35060(16) 0.5631(3) 0.0196(10) Uani 1 1 d . . . 
C1 C 0.4956(6) 0.2864(2) 0.3962(3) 0.0187(13) Uani 1 1 d . . . 
C2 C 0.4971(7) 0.3057(3) 0.3311(4) 0.0278(16) Uani 1 1 d . . . 
H2A H 0.5083 0.3388 0.3335 0.033 Uiso 1 1 calc R . . 
H2B H 0.4311 0.3006 0.3107 0.033 Uiso 1 1 calc R . . 
C3 C 0.5795(8) 0.2842(3) 0.2913(4) 0.0327(18) Uani 1 1 d . . . 
H3A H 0.5598 0.2530 0.2797 0.039 Uiso 1 1 calc R . . 
H3B H 0.6426 0.2826 0.3159 0.039 Uiso 1 1 calc R . . 
C4 C 0.5042(6) 0.2222(2) 0.6251(3) 0.0172(12) Uani 1 1 d . . . 
C5 C 0.4950(6) 0.2016(2) 0.6899(3) 0.0192(13) Uani 1 1 d . . . 
H5A H 0.5145 0.2242 0.7221 0.023 Uiso 1 1 calc R . . 
H5B H 0.5408 0.1754 0.6937 0.023 Uiso 1 1 calc R . . 
C6 C 0.3858(6) 0.1863(3) 0.7007(4) 0.0264(15) Uani 1 1 d . . . 
H6A H 0.3409 0.2130 0.6989 0.032 Uiso 1 1 calc R . . 
H6B H 0.3802 0.1727 0.7430 0.032 Uiso 1 1 calc R . . 
C7 C 0.6753(6) 0.2932(2) 0.5227(3) 0.0194(13) Uani 1 1 d . . . 
C8 C 0.7758(6) 0.3171(3) 0.5267(4) 0.0243(15) Uani 1 1 d . . . 
H8A H 0.7840 0.3306 0.5690 0.029 Uiso 1 1 calc R . . 
H8B H 0.8305 0.2950 0.5205 0.029 Uiso 1 1 calc R . . 
C9 C 0.7827(8) 0.3528(3) 0.4788(4) 0.0347(19) Uani 1 1 d . . . 
H9B H 0.8482 0.3684 0.4826 0.042 Uiso 1 1 calc R . . 
H9C H 0.7289 0.3754 0.4855 0.042 Uiso 1 1 calc R . . 
C10 C 0.3264(5) 0.2148(2) 0.4979(3) 0.0155(11) Uani 1 1 d . . . 
C11 C 0.2243(5) 0.1925(2) 0.4896(3) 0.0172(12) Uani 1 1 d . . . 
H11A H 0.2058 0.1927 0.4445 0.021 Uiso 1 1 calc R . . 
H11B H 0.2284 0.1606 0.5035 0.021 Uiso 1 1 calc R . . 
C12 C 0.1439(6) 0.2166(2) 0.5266(4) 0.0231(14) Uani 1 1 d . . . 
H12A H 0.1492 0.2496 0.5195 0.028 Uiso 1 1 calc R . . 
H12B H 0.1542 0.2108 0.5720 0.028 Uiso 1 1 calc R . . 
Cl1 Cl 0.5991(2) 0.31704(8) 0.22151(10) 0.0361(5) Uani 1 1 d . . . 
Cl2 Cl 0.34619(16) 0.14542(6) 0.64229(9) 0.0279(4) Uani 1 1 d . . . 
Cl3 Cl 0.7703(3) 0.32885(10) 0.40121(12) 0.0606(9) Uani 1 1 d . . . 
Cl4 Cl 0.02186(14) 0.19751(7) 0.50368(10) 0.0272(4) Uani 1 1 d . . . 
Rh3 Rh 1.16328(4) 0.420087(17) 0.78154(2) 0.01416(9) Uani 1 1 d . . . 
Rh4 Rh 1.32401(4) 0.427059(16) 0.73457(2) 0.01403(9) Uani 1 1 d . . . 
O11 O 1.1373(4) 0.36654(18) 0.7245(3) 0.0200(10) Uani 1 1 d . . . 
O12 O 1.2884(4) 0.37260(17) 0.6792(2) 0.0180(9) Uani 1 1 d . . . 
O13 O 1.1984(4) 0.47366(16) 0.8376(2) 0.0172(9) Uani 1 1 d . . . 
O14 O 1.3510(4) 0.48118(16) 0.7924(2) 0.0171(9) Uani 1 1 d . . . 
O15 O 1.2248(4) 0.37699(16) 0.8462(2) 0.0176(9) Uani 1 1 d . . . 
O16 O 1.3762(4) 0.38246(17) 0.7999(2) 0.0191(10) Uani 1 1 d . . . 
O17 O 1.1084(4) 0.46292(18) 0.7166(2) 0.0217(10) Uani 1 1 d . . . 
O18 O 1.2614(5) 0.47153(18) 0.6721(2) 0.0226(11) Uani 1 1 d . . . 
O19 O 1.0047(4) 0.41278(17) 0.8210(2) 0.0177(9) Uani 1 1 d D . . 
H19A H 0.971(6) 0.432(2) 0.844(3) 0.021 Uiso 1 1 d D . . 
H19B H 0.976(6) 0.414(3) 0.7840(19) 0.021 Uiso 1 1 d D . . 
O20 O 1.4830(4) 0.43018(16) 0.6965(3) 0.0195(10) Uani 1 1 d . . . 
C13 C 1.2036(6) 0.3530(2) 0.6880(3) 0.0201(13) Uani 1 1 d . . . 
C14 C 1.1850(6) 0.3090(3) 0.6542(4) 0.0238(15) Uani 1 1 d . . . 
H14A H 1.2173 0.2841 0.6780 0.029 Uiso 1 1 calc R . . 
H14B H 1.2164 0.3102 0.6122 0.029 Uiso 1 1 calc R . . 
C15 C 1.0742(7) 0.2990(3) 0.6468(4) 0.0279(16) Uani 1 1 d . . . 
H15A H 1.0401 0.3033 0.6876 0.033 Uiso 1 1 calc R . . 
H15B H 1.0650 0.2671 0.6338 0.033 Uiso 1 1 calc R . . 
C16 C 1.2819(5) 0.4934(2) 0.8297(3) 0.0166(12) Uani 1 1 d . . . 
C17 C 1.3016(6) 0.5345(2) 0.8712(3) 0.0189(13) Uani 1 1 d . . . 
H17A H 1.2408 0.5537 0.8715 0.023 Uiso 1 1 calc R . . 
H17B H 1.3138 0.5240 0.9148 0.023 Uiso 1 1 calc R . . 
C18 C 1.3895(6) 0.5624(2) 0.8505(4) 0.0201(13) Uani 1 1 d . . . 
H18A H 1.3743 0.5764 0.8093 0.024 Uiso 1 1 calc R . . 
H18B H 1.4491 0.5428 0.8456 0.024 Uiso 1 1 calc R . . 
C19 C 1.3170(6) 0.3669(2) 0.8407(3) 0.0178(12) Uani 1 1 d . . . 
C20 C 1.3609(7) 0.3335(3) 0.8873(4) 0.0248(15) Uani 1 1 d . . . 
H20B H 1.4345 0.3319 0.8814 0.030 Uiso 1 1 calc R . . 
H20C H 1.3485 0.3446 0.9305 0.030 Uiso 1 1 calc R . . 
C21 C 1.3176(8) 0.2871(3) 0.8805(4) 0.035(2) Uani 1 1 d . . . 
H21A H 1.2447 0.2880 0.8893 0.042 Uiso 1 1 calc R . . 
H21B H 1.3498 0.2664 0.9111 0.042 Uiso 1 1 calc R . . 
C22 C 1.1682(6) 0.4811(2) 0.6788(3) 0.0227(14) Uani 1 1 d . . . 
C23 C 1.1233(7) 0.5180(3) 0.6375(4) 0.0263(16) Uani 1 1 d . . . 
H23A H 1.1118 0.5056 0.5949 0.032 Uiso 1 1 calc R . . 
H23B H 1.0572 0.5268 0.6547 0.032 Uiso 1 1 calc R . . 
C24 C 1.1878(8) 0.5590(3) 0.6327(4) 0.0338(19) Uani 1 1 d . . . 
H24A H 1.1531 0.5821 0.6069 0.041 Uiso 1 1 calc R . . 
H24B H 1.2515 0.5511 0.6116 0.041 Uiso 1 1 calc R . . 
Cl5 Cl 1.0201(2) 0.33540(12) 0.58954(13) 0.0532(7) Uani 1 1 d . . . 
Cl6 Cl 1.41618(15) 0.60581(6) 0.90687(9) 0.0245(3) Uani 1 1 d . . . 
Cl7 Cl 1.3382(2) 0.26680(7) 0.80147(11) 0.0380(5) Uani 1 1 d . . . 
Cl8 Cl 1.21485(17) 0.58216(7) 0.71059(11) 0.0314(4) Uani 1 1 d . . . 
Rh5 Rh 0.83517(4) 0.320796(16) 0.78183(2) 0.01420(9) Uani 1 1 d . . . 
Rh6 Rh 0.67388(4) 0.322289(18) 0.73314(3) 0.01751(10) Uani 1 1 d . . . 
O21 O 0.8743(4) 0.27325(16) 0.7182(3) 0.0207(10) Uani 1 1 d . . . 
O22 O 0.7231(5) 0.27488(19) 0.6705(3) 0.0256(12) Uani 1 1 d . . . 
O23 O 0.7851(4) 0.36847(17) 0.8446(2) 0.0178(9) Uani 1 1 d . . . 
O24 O 0.6332(4) 0.36837(19) 0.7973(3) 0.0224(11) Uani 1 1 d . . . 
O25 O 0.7896(5) 0.26914(18) 0.8373(3) 0.0257(12) Uani 1 1 d . . . 
O26 O 0.6362(5) 0.2704(2) 0.7914(3) 0.0285(13) Uani 1 1 d . . . 
O27 O 0.8762(4) 0.37325(16) 0.7259(2) 0.0172(9) Uani 1 1 d . . . 
O28 O 0.7241(4) 0.37469(17) 0.6771(3) 0.0195(10) Uani 1 1 d . . . 
O29 O 0.9913(4) 0.31996(16) 0.8228(3) 0.0194(10) Uani 1 1 d . . . 
O30 O 0.5101(4) 0.33268(19) 0.6964(3) 0.0236(11) Uani 1 1 d D . . 
H30A H 0.494(6) 0.309(2) 0.674(4) 0.028 Uiso 1 1 d D . . 
H30D H 0.459(5) 0.338(3) 0.721(4) 0.028 Uiso 1 1 d D . . 
C25 C 0.8114(6) 0.2603(2) 0.6781(4) 0.0234(15) Uani 1 1 d . . . 
C26 C 0.8466(8) 0.2225(3) 0.6341(4) 0.035(2) Uani 1 1 d . . . 
H26A H 0.8485 0.2346 0.5907 0.041 Uiso 1 1 calc R . . 
H26B H 0.9161 0.2141 0.6460 0.041 Uiso 1 1 calc R . . 
C27 C 0.7845(9) 0.1818(3) 0.6344(5) 0.040(2) Uani 1 1 d . . . 
H27A H 0.8157 0.1586 0.6071 0.048 Uiso 1 1 calc R . . 
H27B H 0.7174 0.1890 0.6168 0.048 Uiso 1 1 calc R . . 
C28 C 0.6947(5) 0.3821(2) 0.8386(3) 0.0188(13) Uani 1 1 d . . . 
C29 C 0.6573(7) 0.4161(3) 0.8860(4) 0.0255(15) Uani 1 1 d . . . 
H29B H 0.7113 0.4381 0.8954 0.031 Uiso 1 1 calc R . . 
H29C H 0.6401 0.4003 0.9255 0.031 Uiso 1 1 calc R . . 
C30 C 0.5656(6) 0.4411(3) 0.8615(4) 0.0232(14) Uani 1 1 d . . . 
H30B H 0.5242 0.4204 0.8355 0.028 Uiso 1 1 calc R . . 
H30C H 0.5871 0.4666 0.8346 0.028 Uiso 1 1 calc R . . 
C31 C 0.7029(7) 0.2536(3) 0.8286(4) 0.0272(16) Uani 1 1 d . . . 
C32 C 0.6804(7) 0.2108(3) 0.8672(5) 0.0334(19) Uani 1 1 d . . . 
H32A H 0.7149 0.1846 0.8481 0.040 Uiso 1 1 calc R . . 
H32B H 0.7067 0.2146 0.9104 0.040 Uiso 1 1 calc R . . 
C33 C 0.5690(9) 0.2016(4) 0.8696(6) 0.050(3) Uani 1 1 d . . . 
H33A H 0.5425 0.1961 0.8267 0.060 Uiso 1 1 calc R . . 
H33B H 0.5335 0.2280 0.8875 0.060 Uiso 1 1 calc R . . 
C34 C 0.8133(5) 0.3895(2) 0.6877(3) 0.0189(13) Uani 1 1 d . . . 
C35 C 0.8438(7) 0.4327(3) 0.6538(4) 0.0270(16) Uani 1 1 d . . . 
H35A H 0.8380 0.4279 0.6078 0.032 Uiso 1 1 calc R . . 
H35B H 0.9149 0.4396 0.6636 0.032 Uiso 1 1 calc R . . 
C36 C 0.7780(7) 0.4726(3) 0.6729(4) 0.0296(17) Uani 1 1 d . . . 
H36A H 0.7079 0.4672 0.6591 0.036 Uiso 1 1 calc R . . 
H36B H 0.8023 0.5005 0.6524 0.036 Uiso 1 1 calc R . . 
Cl9 Cl 0.77050(18) 0.15919(7) 0.71255(11) 0.0334(4) Uani 1 1 d . . . 
Cl10 Cl 0.49313(17) 0.46187(8) 0.92517(11) 0.0347(4) Uani 1 1 d . . . 
Cl11 Cl 0.5497(3) 0.15264(10) 0.91796(13) 0.0517(7) Uani 1 1 d . . . 
Cl12 Cl 0.78233(18) 0.47926(7) 0.75653(10) 0.0309(4) Uani 1 1 d . . . 
Rh7 Rh 0.45972(4) 0.532166(16) 0.47723(2) 0.01505(9) Uani 1 1 d . . . 
O31 O 0.4815(4) 0.50361(17) 0.3919(2) 0.0207(10) Uani 1 1 d . . . 
O32 O 0.5589(4) 0.44270(17) 0.4347(3) 0.0194(10) Uani 1 1 d . . . 
O33 O 0.3258(4) 0.49928(16) 0.4825(2) 0.0193(10) Uani 1 1 d . . . 
O34 O 0.4026(4) 0.43815(17) 0.5249(3) 0.0191(10) Uani 1 1 d . . . 
O35 O 0.3893(4) 0.59489(17) 0.4293(3) 0.0231(11) Uani 1 1 d . . . 
C37 C 0.5244(6) 0.4648(2) 0.3886(3) 0.0193(13) Uani 1 1 d . . . 
C38 C 0.5300(6) 0.4439(3) 0.3242(4) 0.0245(14) Uani 1 1 d . . . 
H38A H 0.5593 0.4132 0.3277 0.029 Uiso 1 1 calc R . . 
H38B H 0.5750 0.4623 0.2976 0.029 Uiso 1 1 calc R . . 
C39 C 0.4277(8) 0.4407(3) 0.2930(4) 0.0340(19) Uani 1 1 d . . . 
H39A H 0.4335 0.4234 0.2533 0.041 Uiso 1 1 calc R . . 
H39B H 0.4033 0.4714 0.2826 0.041 Uiso 1 1 calc R . . 
C40 C 0.3258(6) 0.4596(2) 0.5055(3) 0.0201(13) Uani 1 1 d . . . 
C41 C 0.2250(6) 0.4355(3) 0.5121(4) 0.0231(14) Uani 1 1 d . . . 
H41A H 0.2062 0.4350 0.5571 0.028 Uiso 1 1 calc R . . 
H41B H 0.2326 0.4038 0.4981 0.028 Uiso 1 1 calc R . . 
C42 C 0.1402(5) 0.4576(3) 0.4744(4) 0.0225(14) Uani 1 1 d . . . 
H42A H 0.1459 0.4491 0.4296 0.027 Uiso 1 1 calc R . . 
H42B H 0.1456 0.4909 0.4775 0.027 Uiso 1 1 calc R . . 
Cl13 Cl 0.33862(18) 0.41307(8) 0.34357(13) 0.0380(5) Uani 1 1 d . . . 
Cl14 Cl 0.02051(15) 0.43958(6) 0.50418(11) 0.0283(4) Uani 1 1 d . . . 
Rh8 Rh 0.45696(4) 0.033949(15) 0.48562(2) 0.01238(9) Uani 1 1 d . . . 
O36 O 0.3257(4) -0.00135(16) 0.4891(2) 0.0174(9) Uani 1 1 d . . . 
O37 O 0.4080(4) -0.06567(16) 0.5154(2) 0.0164(9) Uani 1 1 d . . . 
O38 O 0.4692(4) 0.01439(16) 0.3942(2) 0.0162(9) Uani 1 1 d . . . 
O39 O 0.5502(4) -0.04951(16) 0.4216(2) 0.0181(9) Uani 1 1 d . . . 
O40 O 0.3776(4) 0.09965(16) 0.4585(2) 0.0191(10) Uani 1 1 d D . . 
H40A H 0.373(7) 0.105(3) 0.4178(11) 0.023 Uiso 1 1 d D . . 
H40B H 0.402(7) 0.1253(17) 0.473(3) 0.023 Uiso 1 1 d D . . 
C43 C 0.3284(5) -0.0433(2) 0.5020(3) 0.0164(11) Uani 1 1 d . . . 
C44 C 0.2333(6) -0.0702(3) 0.5009(4) 0.0244(15) Uani 1 1 d . . . 
H44A H 0.2074 -0.0727 0.5443 0.029 Uiso 1 1 calc R . . 
H44B H 0.2483 -0.1012 0.4860 0.029 Uiso 1 1 calc R . . 
C45 C 0.1527(6) -0.0498(3) 0.4595(4) 0.0252(15) Uani 1 1 d . . . 
H45A H 0.1432 -0.0176 0.4707 0.030 Uiso 1 1 calc R . . 
H45B H 0.0884 -0.0658 0.4666 0.030 Uiso 1 1 calc R . . 
C46 C 0.5121(5) -0.0236(2) 0.3818(3) 0.0150(11) Uani 1 1 d . . . 
C47 C 0.5119(6) -0.0382(2) 0.3139(3) 0.0191(13) Uani 1 1 d . . . 
H47A H 0.5789 -0.0501 0.3025 0.023 Uiso 1 1 calc R . . 
H47B H 0.4970 -0.0119 0.2866 0.023 Uiso 1 1 calc R . . 
C48 C 0.4327(6) -0.0746(2) 0.3039(3) 0.0211(13) Uani 1 1 d . . . 
H48A H 0.3655 -0.0623 0.3137 0.025 Uiso 1 1 calc R . . 
H48B H 0.4460 -0.1003 0.3326 0.025 Uiso 1 1 calc R . . 
Cl15 Cl 0.18636(16) -0.05419(8) 0.37770(9) 0.0297(4) Uani 1 1 d . . . 
Cl16 Cl 0.43507(16) -0.09396(7) 0.22416(9) 0.0295(4) Uani 1 1 d . . . 
 
loop_ 
 _atom_site_aniso_label 
 _atom_site_aniso_U_11 
 _atom_site_aniso_U_22 
 _atom_site_aniso_U_33 
 _atom_site_aniso_U_23 
 _atom_site_aniso_U_13 
 _atom_site_aniso_U_12 
Rh1 0.0164(2) 0.00850(18) 0.0140(2) -0.00170(15) 0.00047(18) 0.00068(16) 
Rh2 0.0162(2) 0.00810(18) 0.0152(2) -0.00228(15) 0.00073(18) -0.00030(16) 
O1 0.023(2) 0.0114(19) 0.014(2) 0.0013(15) 0.0026(18) 0.0026(18) 
O2 0.026(3) 0.015(2) 0.018(2) 0.0026(17) 0.005(2) 0.0037(19) 
O3 0.024(2) 0.013(2) 0.014(2) -0.0030(16) 0.0011(19) 0.0007(19) 
O4 0.028(3) 0.0109(19) 0.014(2) -0.0029(15) -0.0008(19) 0.0015(19) 
O5 0.018(2) 0.016(2) 0.024(2) -0.0058(18) 0.0016(19) -0.0014(18) 
O6 0.025(3) 0.013(2) 0.026(3) -0.0054(19) 0.003(2) -0.0040(18) 
O7 0.023(2) 0.0100(19) 0.021(2) -0.0029(17) 0.0033(19) -0.0007(17) 
O8 0.017(2) 0.0109(19) 0.025(2) -0.0023(17) 0.0003(19) 0.0015(17) 
O9 0.029(3) 0.010(2) 0.024(3) 0.0019(18) 0.011(2) 0.0020(19) 
O10 0.028(3) 0.010(2) 0.021(2) -0.0009(17) 0.007(2) 0.0001(18) 
C1 0.022(3) 0.016(3) 0.018(3) 0.002(2) 0.001(2) 0.000(2) 
C2 0.038(4) 0.023(4) 0.022(4) 0.006(3) 0.006(3) 0.005(3) 
C3 0.042(5) 0.031(4) 0.026(4) 0.008(3) 0.010(4) 0.007(3) 
C4 0.025(3) 0.012(3) 0.015(3) -0.001(2) -0.002(2) 0.002(2) 
C5 0.028(3) 0.016(3) 0.014(3) 0.001(2) -0.003(2) 0.000(2) 
C6 0.031(4) 0.026(4) 0.022(4) -0.001(3) 0.006(3) -0.006(3) 
C7 0.023(3) 0.012(3) 0.022(3) -0.004(2) -0.001(3) -0.004(2) 
C8 0.021(3) 0.023(3) 0.028(4) -0.009(3) 0.005(3) -0.006(3) 
C9 0.046(5) 0.031(4) 0.028(4) -0.005(3) 0.007(4) -0.009(4) 
C10 0.016(3) 0.017(3) 0.013(3) 0.001(2) 0.002(2) -0.004(2) 
C11 0.016(3) 0.015(3) 0.020(3) -0.004(2) 0.001(2) -0.006(2) 
C12 0.022(3) 0.020(3) 0.027(4) -0.006(3) 0.005(3) -0.002(2) 
Cl1 0.0514(13) 0.0325(10) 0.0244(9) 0.0042(8) 0.0087(9) -0.0095(9) 
Cl2 0.0338(10) 0.0228(8) 0.0273(9) -0.0048(7) 0.0008(7) -0.0064(7) 
Cl3 0.112(3) 0.0414(14) 0.0286(12) -0.0007(10) 0.0009(14) -0.0364(16) 
Cl4 0.0191(8) 0.0303(9) 0.0321(9) -0.0025(7) -0.0014(7) -0.0035(6) 
Rh3 0.0155(2) 0.0140(2) 0.0130(2) -0.00344(16) 0.00107(18) 0.00183(17) 
Rh4 0.0176(2) 0.0122(2) 0.0123(2) -0.00055(15) 0.00259(18) 0.00123(17) 
O11 0.017(2) 0.021(2) 0.022(2) -0.0089(19) 0.0031(19) -0.0004(18) 
O12 0.018(2) 0.018(2) 0.018(2) -0.0056(18) 0.0062(18) -0.0017(18) 
O13 0.021(2) 0.014(2) 0.016(2) -0.0035(17) 0.0036(18) -0.0006(18) 
O14 0.020(2) 0.014(2) 0.017(2) -0.0022(17) 0.0025(18) 0.0008(17) 
O15 0.021(2) 0.013(2) 0.018(2) -0.0006(17) 0.0024(18) 0.0013(17) 
O16 0.020(2) 0.018(2) 0.019(2) 0.0012(18) -0.0010(19) 0.0036(18) 
O17 0.024(3) 0.025(3) 0.016(2) -0.0028(19) -0.0029(19) 0.010(2) 
O18 0.035(3) 0.018(2) 0.014(2) 0.0030(18) 0.003(2) 0.003(2) 
O19 0.020(2) 0.015(2) 0.019(2) -0.0065(17) 0.0017(18) -0.0015(18) 
O20 0.021(2) 0.014(2) 0.023(2) 0.0025(18) 0.0070(19) 0.0007(17) 
C13 0.028(4) 0.017(3) 0.015(3) -0.004(2) -0.002(3) 0.004(3) 
C14 0.024(3) 0.019(3) 0.029(4) -0.009(3) 0.003(3) 0.000(3) 
C15 0.034(4) 0.021(3) 0.028(4) -0.009(3) 0.006(3) -0.006(3) 
C16 0.020(3) 0.015(3) 0.015(3) -0.002(2) 0.000(2) 0.005(2) 
C17 0.024(3) 0.013(3) 0.020(3) -0.006(2) 0.002(3) 0.000(2) 
C18 0.024(3) 0.014(3) 0.022(3) -0.004(2) 0.001(3) -0.002(2) 
C19 0.024(3) 0.014(3) 0.016(3) 0.001(2) 0.001(2) 0.001(2) 
C20 0.037(4) 0.019(3) 0.018(3) 0.005(3) 0.000(3) 0.001(3) 
C21 0.050(6) 0.022(4) 0.033(4) 0.004(3) 0.007(4) 0.002(4) 
C22 0.034(4) 0.016(3) 0.018(3) -0.005(2) -0.009(3) 0.004(3) 
C23 0.038(4) 0.018(3) 0.023(3) 0.002(3) -0.002(3) 0.007(3) 
C24 0.052(6) 0.024(4) 0.025(4) 0.000(3) -0.002(4) 0.001(4) 
Cl5 0.0464(15) 0.074(2) 0.0387(13) 0.0066(13) -0.0182(11) -0.0009(13) 
Cl6 0.0283(9) 0.0166(7) 0.0287(9) -0.0053(6) -0.0043(7) 0.0012(6) 
Cl7 0.0509(13) 0.0271(9) 0.0360(11) -0.0116(8) 0.0017(10) 0.0060(9) 
Cl8 0.0341(10) 0.0273(9) 0.0326(10) -0.0059(8) -0.0025(8) 0.0047(8) 
Rh5 0.0192(2) 0.00916(19) 0.0142(2) -0.00117(15) 0.00181(19) -0.00055(16) 
Rh6 0.0181(2) 0.0191(2) 0.0154(2) -0.00632(17) 0.00170(19) -0.00523(18) 
O21 0.028(3) 0.012(2) 0.023(2) -0.0001(18) 0.006(2) 0.0013(18) 
O22 0.037(3) 0.020(2) 0.020(3) -0.009(2) 0.006(2) -0.006(2) 
O23 0.022(2) 0.017(2) 0.014(2) -0.0060(17) -0.0005(18) 0.0006(18) 
O24 0.017(2) 0.029(3) 0.021(3) -0.012(2) -0.0010(19) 0.002(2) 
O25 0.043(3) 0.017(2) 0.017(2) 0.0024(19) 0.006(2) -0.004(2) 
O26 0.031(3) 0.029(3) 0.025(3) -0.011(2) 0.012(2) -0.019(2) 
O27 0.019(2) 0.012(2) 0.020(2) 0.0029(17) 0.0007(18) 0.0008(17) 
O28 0.020(2) 0.019(2) 0.019(2) -0.0003(18) 0.0003(19) -0.0014(18) 
O29 0.024(3) 0.011(2) 0.023(2) 0.0005(17) -0.007(2) 0.0022(17) 
O30 0.019(2) 0.025(3) 0.027(3) -0.012(2) 0.000(2) -0.002(2) 
C25 0.033(4) 0.014(3) 0.023(3) -0.001(2) 0.014(3) -0.002(3) 
C26 0.058(6) 0.021(4) 0.025(4) -0.010(3) 0.017(4) -0.005(4) 
C27 0.053(6) 0.032(5) 0.036(5) -0.002(4) -0.001(4) 0.008(4) 
C28 0.020(3) 0.019(3) 0.017(3) -0.006(2) 0.001(2) -0.002(2) 
C29 0.030(4) 0.021(3) 0.025(4) -0.007(3) -0.006(3) 0.008(3) 
C30 0.027(4) 0.024(3) 0.019(3) -0.002(3) 0.003(3) 0.008(3) 
C31 0.040(5) 0.020(3) 0.021(4) -0.004(3) 0.006(3) -0.007(3) 
C32 0.031(4) 0.030(4) 0.039(5) 0.002(3) 0.007(4) -0.009(3) 
C33 0.047(6) 0.046(6) 0.058(7) 0.019(5) 0.000(5) -0.016(5) 
C34 0.021(3) 0.016(3) 0.019(3) -0.001(2) 0.000(2) 0.004(2) 
C35 0.038(4) 0.021(3) 0.022(3) 0.006(3) 0.001(3) 0.001(3) 
C36 0.040(5) 0.020(3) 0.029(4) 0.001(3) -0.004(3) 0.003(3) 
Cl9 0.0464(12) 0.0193(8) 0.0345(10) 0.0027(7) 0.0065(9) -0.0049(8) 
Cl10 0.0343(10) 0.0406(11) 0.0292(10) -0.0035(8) 0.0069(8) 0.0104(9) 
Cl11 0.0649(18) 0.0462(14) 0.0439(14) 0.0167(11) -0.0043(13) -0.0167(13) 
Cl12 0.0418(11) 0.0223(8) 0.0285(9) -0.0046(7) -0.0010(8) -0.0018(8) 
Rh7 0.0189(2) 0.01002(19) 0.0162(2) 0.00070(15) 0.00355(19) 0.00103(17) 
O31 0.028(3) 0.015(2) 0.019(2) 0.0002(18) 0.006(2) 0.0005(19) 
O32 0.022(2) 0.014(2) 0.022(2) -0.0006(18) 0.0058(19) 0.0025(18) 
O33 0.020(2) 0.014(2) 0.024(2) 0.0018(18) 0.004(2) -0.0010(18) 
O34 0.019(2) 0.015(2) 0.024(3) 0.0027(18) 0.0042(19) 0.0022(18) 
O35 0.030(3) 0.009(2) 0.030(3) -0.0023(19) -0.010(2) 0.0009(19) 
C37 0.022(3) 0.016(3) 0.020(3) -0.001(2) 0.006(3) -0.001(2) 
C38 0.027(4) 0.024(3) 0.023(3) -0.002(3) 0.003(3) -0.002(3) 
C39 0.048(5) 0.031(4) 0.022(4) -0.007(3) -0.005(4) 0.006(4) 
C40 0.023(3) 0.015(3) 0.022(3) 0.001(2) 0.005(3) 0.001(2) 
C41 0.020(3) 0.018(3) 0.031(4) 0.008(3) 0.003(3) 0.000(2) 
C42 0.016(3) 0.025(3) 0.027(4) 0.002(3) 0.002(3) 0.005(2) 
Cl13 0.0298(10) 0.0344(10) 0.0500(13) -0.0158(9) 0.0020(9) -0.0035(8) 
Cl14 0.0260(9) 0.0208(8) 0.0383(10) -0.0015(7) 0.0038(8) -0.0015(6) 
Rh8 0.0160(2) 0.00871(18) 0.0124(2) 0.00231(14) 0.00023(17) 0.00005(16) 
O36 0.020(2) 0.014(2) 0.018(2) 0.0032(16) -0.0003(18) -0.0024(18) 
O37 0.016(2) 0.014(2) 0.019(2) 0.0037(17) -0.0012(18) -0.0018(17) 
O38 0.021(2) 0.013(2) 0.016(2) 0.0018(16) -0.0005(18) 0.0017(17) 
O39 0.024(2) 0.014(2) 0.016(2) 0.0027(16) 0.0007(19) 0.0015(19) 
O40 0.031(3) 0.010(2) 0.016(2) -0.0003(16) -0.006(2) 0.0001(18) 
C43 0.021(3) 0.014(3) 0.014(3) 0.003(2) 0.001(2) 0.000(2) 
C44 0.023(3) 0.023(3) 0.027(4) 0.011(3) -0.009(3) -0.008(3) 
C45 0.024(3) 0.028(4) 0.024(3) 0.005(3) 0.000(3) -0.003(3) 
C46 0.021(3) 0.011(3) 0.013(3) -0.001(2) 0.003(2) -0.003(2) 
C47 0.028(3) 0.016(3) 0.014(3) -0.003(2) 0.002(2) -0.005(2) 
C48 0.028(4) 0.019(3) 0.016(3) -0.001(2) 0.001(3) -0.007(3) 
Cl15 0.0283(9) 0.0395(10) 0.0213(8) -0.0015(7) 0.0007(7) 0.0010(8) 
Cl16 0.0376(10) 0.0304(9) 0.0205(8) -0.0041(7) -0.0019(7) -0.0092(7) 
 
_geom_special_details 
; 
 All esds (except the esd in the dihedral angle between two l.s. planes) 
 are estimated using the full covariance matrix.  The cell esds are taken 
 into account individually in the estimation of esds in distances, angles 
 and torsion angles; correlations between esds in cell parameters are only 
 used when they are defined by crystal symmetry.  An approximate (isotropic) 
 treatment of cell esds is used for estimating esds involving l.s. planes. 
; 
 
loop_ 
 _geom_bond_atom_site_label_1 
 _geom_bond_atom_site_label_2 
 _geom_bond_distance 
 _geom_bond_site_symmetry_2 
 _geom_bond_publ_flag 
Rh1 O3 2.026(5) . ? 
Rh1 O5 2.031(5) . ? 
Rh1 O1 2.035(5) . ? 
Rh1 O7 2.043(5) . ? 
Rh1 O9 2.314(5) . ? 
Rh1 Rh2 2.3828(7) . ? 
Rh2 O8 2.022(5) . ? 
Rh2 O2 2.030(5) . ? 
Rh2 O6 2.035(5) . ? 
Rh2 O4 2.039(5) . ? 
Rh2 O10 2.268(5) . ? 
O1 C1 1.285(8) . ? 
O2 C1 1.256(9) . ? 
O3 C4 1.265(8) . ? 
O4 C4 1.278(8) . ? 
O5 C7 1.268(8) . ? 
O6 C7 1.263(9) . ? 
O7 C10 1.264(8) . ? 
O8 C10 1.260(8) . ? 
O9 H9A 0.88(2) . ? 
O9 H9D 0.88(2) . ? 
C1 C2 1.499(10) . ? 
C2 C3 1.528(12) . ? 
C2 H2A 0.9900 . ? 
C2 H2B 0.9900 . ? 
C3 Cl1 1.796(9) . ? 
C3 H3A 0.9900 . ? 
C3 H3B 0.9900 . ? 
C4 C5 1.514(10) . ? 
C5 C6 1.542(11) . ? 
C5 H5A 0.9900 . ? 
C5 H5B 0.9900 . ? 
C6 Cl2 1.810(8) . ? 
C6 H6A 0.9900 . ? 
C6 H6B 0.9900 . ? 
C7 C8 1.516(10) . ? 
C8 C9 1.471(12) . ? 
C8 H8A 0.9900 . ? 
C8 H8B 0.9900 . ? 
C9 Cl3 1.803(9) . ? 
C9 H9B 0.9900 . ? 
C9 H9C 0.9900 . ? 
C10 C11 1.521(9) . ? 
C11 C12 1.511(10) . ? 
C11 H11A 0.9900 . ? 
C11 H11B 0.9900 . ? 
C12 Cl4 1.787(8) . ? 
C12 H12A 0.9900 . ? 
C12 H12B 0.9900 . ? 
Rh3 O17 2.010(5) . ? 
Rh3 O11 2.023(5) . ? 
Rh3 O13 2.036(5) . ? 
Rh3 O15 2.044(5) . ? 
Rh3 O19 2.287(5) . ? 
Rh3 Rh4 2.3761(8) . ? 
Rh4 O16 2.036(5) . ? 
Rh4 O18 2.045(5) . ? 
Rh4 O14 2.049(5) . ? 
Rh4 O12 2.050(5) . ? 
Rh4 O20 2.274(5) . ? 
O11 C13 1.247(9) . ? 
O12 C13 1.284(9) . ? 
O13 C16 1.268(9) . ? 
O14 C16 1.272(8) . ? 
O15 C19 1.269(9) . ? 
O16 C19 1.262(9) . ? 
O17 C22 1.255(10) . ? 
O18 C22 1.281(10) . ? 
O19 H19A 0.88(2) . ? 
O19 H19B 0.88(2) . ? 
C13 C14 1.506(10) . ? 
C14 C15 1.512(12) . ? 
C14 H14A 0.9900 . ? 
C14 H14B 0.9900 . ? 
C15 Cl5 1.777(10) . ? 
C15 H15A 0.9900 . ? 
C15 H15B 0.9900 . ? 
C16 C17 1.523(9) . ? 
C17 C18 1.501(10) . ? 
C17 H17A 0.9900 . ? 
C17 H17B 0.9900 . ? 
C18 Cl6 1.790(7) . ? 
C18 H18A 0.9900 . ? 
C18 H18B 0.9900 . ? 
C19 C20 1.516(10) . ? 
C20 C21 1.495(12) . ? 
C20 H20B 0.9900 . ? 
C20 H20C 0.9900 . ? 
C21 Cl7 1.809(10) . ? 
C21 H21A 0.9900 . ? 
C21 H21B 0.9900 . ? 
C22 C23 1.521(10) . ? 
C23 C24 1.491(12) . ? 
C23 H23A 0.9900 . ? 
C23 H23B 0.9900 . ? 
C24 Cl8 1.828(9) . ? 
C24 H24A 0.9900 . ? 
C24 H24B 0.9900 . ? 
Rh5 O21 2.022(5) . ? 
Rh5 O25 2.025(5) . ? 
Rh5 O27 2.032(5) . ? 
Rh5 O23 2.055(5) . ? 
Rh5 O29 2.250(5) . ? 
Rh5 Rh6 2.3805(9) . ? 
Rh6 O24 2.006(5) . ? 
Rh6 O26 2.038(6) . ? 
Rh6 O22 2.045(5) . ? 
Rh6 O28 2.068(5) . ? 
Rh6 O30 2.333(6) . ? 
O21 C25 1.253(10) . ? 
O22 C25 1.262(11) . ? 
O23 C28 1.275(9) . ? 
O24 C28 1.266(9) . ? 
O25 C31 1.255(11) . ? 
O26 C31 1.285(11) . ? 
O27 C34 1.259(8) . ? 
O28 C34 1.285(9) . ? 
O30 H30A 0.88(2) . ? 
O30 H30D 0.87(2) . ? 
C25 C26 1.533(11) . ? 
C26 C27 1.462(14) . ? 
C26 H26A 0.9900 . ? 
C26 H26B 0.9900 . ? 
C27 Cl9 1.803(11) . ? 
C27 H27A 0.9900 . ? 
C27 H27B 0.9900 . ? 
C28 C29 1.510(10) . ? 
C29 C30 1.517(11) . ? 
C29 H29B 0.9900 . ? 
C29 H29C 0.9900 . ? 
C30 Cl10 1.779(8) . ? 
C30 H30B 0.9900 . ? 
C30 H30C 0.9900 . ? 
C31 C32 1.541(12) . ? 
C32 C33 1.509(14) . ? 
C32 H32A 0.9900 . ? 
C32 H32B 0.9900 . ? 
C33 Cl11 1.797(11) . ? 
C33 H33A 0.9900 . ? 
C33 H33B 0.9900 . ? 
C34 C35 1.523(10) . ? 
C35 C36 1.527(12) . ? 
C35 H35A 0.9900 . ? 
C35 H35B 0.9900 . ? 
C36 Cl12 1.791(9) . ? 
C36 H36A 0.9900 . ? 
C36 H36B 0.9900 . ? 
Rh7 O31 2.025(5) . ? 
Rh7 O32 2.032(5) 3_666 ? 
Rh7 O34 2.034(5) 3_666 ? 
Rh7 O33 2.035(5) . ? 
Rh7 O35 2.313(5) . ? 
Rh7 Rh7 2.3870(10) 3_666 ? 
O31 C37 1.285(8) . ? 
O32 C37 1.263(9) . ? 
O32 Rh7 2.032(5) 3_666 ? 
O33 C40 1.271(8) . ? 
O34 C40 1.271(9) . ? 
O34 Rh7 2.034(5) 3_666 ? 
C37 C38 1.507(10) . ? 
C38 C39 1.516(13) . ? 
C38 H38A 0.9900 . ? 
C38 H38B 0.9900 . ? 
C39 Cl13 1.801(10) . ? 
C39 H39A 0.9900 . ? 
C39 H39B 0.9900 . ? 
C40 C41 1.526(11) . ? 
C41 C42 1.529(10) . ? 
C41 H41A 0.9900 . ? 
C41 H41B 0.9900 . ? 
C42 Cl14 1.799(8) . ? 
C42 H42A 0.9900 . ? 
C42 H42B 0.9900 . ? 
Rh8 O37 2.029(5) 3_656 ? 
Rh8 O39 2.030(5) 3_656 ? 
Rh8 O38 2.036(5) . ? 
Rh8 O36 2.037(5) . ? 
Rh8 O40 2.284(5) . ? 
Rh8 Rh8 2.3901(10) 3_656 ? 
O36 C43 1.270(8) . ? 
O37 C43 1.281(8) . ? 
O37 Rh8 2.029(5) 3_656 ? 
O38 C46 1.289(8) . ? 
O39 C46 1.247(8) . ? 
O39 Rh8 2.030(5) 3_656 ? 
O40 H40A 0.88(2) . ? 
O40 H40B 0.88(2) . ? 
C43 C44 1.497(10) . ? 
C44 C45 1.512(11) . ? 
C44 H44A 0.9900 . ? 
C44 H44B 0.9900 . ? 
C45 Cl15 1.804(8) . ? 
C45 H45A 0.9900 . ? 
C45 H45B 0.9900 . ? 
C46 C47 1.509(9) . ? 
C47 C48 1.522(10) . ? 
C47 H47A 0.9900 . ? 
C47 H47B 0.9900 . ? 
C48 Cl16 1.792(7) . ? 
C48 H48A 0.9900 . ? 
C48 H48B 0.9900 . ? 
 
loop_ 
 _geom_angle_atom_site_label_1 
 _geom_angle_atom_site_label_2 
 _geom_angle_atom_site_label_3 
 _geom_angle 
 _geom_angle_site_symmetry_1 
 _geom_angle_site_symmetry_3 
 _geom_angle_publ_flag 
O3 Rh1 O5 90.4(2) . . ? 
O3 Rh1 O1 175.93(19) . . ? 
O5 Rh1 O1 88.7(2) . . ? 
O3 Rh1 O7 89.0(2) . . ? 
O5 Rh1 O7 176.6(2) . . ? 
O1 Rh1 O7 91.6(2) . . ? 
O3 Rh1 O9 93.28(19) . . ? 
O5 Rh1 O9 92.9(2) . . ? 
O1 Rh1 O9 90.74(19) . . ? 
O7 Rh1 O9 90.5(2) . . ? 
O3 Rh1 Rh2 88.67(14) . . ? 
O5 Rh1 Rh2 88.78(14) . . ? 
O1 Rh1 Rh2 87.33(13) . . ? 
O7 Rh1 Rh2 87.83(14) . . ? 
O9 Rh1 Rh2 177.41(15) . . ? 
O8 Rh2 O2 90.6(2) . . ? 
O8 Rh2 O6 175.7(2) . . ? 
O2 Rh2 O6 88.7(2) . . ? 
O8 Rh2 O4 88.6(2) . . ? 
O2 Rh2 O4 176.85(19) . . ? 
O6 Rh2 O4 91.8(2) . . ? 
O8 Rh2 O10 91.3(2) . . ? 
O2 Rh2 O10 91.59(19) . . ? 
O6 Rh2 O10 93.0(2) . . ? 
O4 Rh2 O10 91.49(19) . . ? 
O8 Rh2 Rh1 88.31(13) . . ? 
O2 Rh2 Rh1 88.96(14) . . ? 
O6 Rh2 Rh1 87.44(15) . . ? 
O4 Rh2 Rh1 87.96(14) . . ? 
O10 Rh2 Rh1 179.33(14) . . ? 
C1 O1 Rh1 119.8(4) . . ? 
C1 O2 Rh2 119.0(5) . . ? 
C4 O3 Rh1 118.8(4) . . ? 
C4 O4 Rh2 118.6(4) . . ? 
C7 O5 Rh1 118.4(5) . . ? 
C7 O6 Rh2 119.8(4) . . ? 
C10 O7 Rh1 118.7(4) . . ? 
C10 O8 Rh2 119.4(5) . . ? 
Rh1 O9 H9A 126(5) . . ? 
Rh1 O9 H9D 130(5) . . ? 
H9A O9 H9D 105(4) . . ? 
O2 C1 O1 124.7(6) . . ? 
O2 C1 C2 117.3(6) . . ? 
O1 C1 C2 118.0(6) . . ? 
C1 C2 C3 111.5(7) . . ? 
C1 C2 H2A 109.3 . . ? 
C3 C2 H2A 109.3 . . ? 
C1 C2 H2B 109.3 . . ? 
C3 C2 H2B 109.3 . . ? 
H2A C2 H2B 108.0 . . ? 
C2 C3 Cl1 109.9(6) . . ? 
C2 C3 H3A 109.7 . . ? 
Cl1 C3 H3A 109.7 . . ? 
C2 C3 H3B 109.7 . . ? 
Cl1 C3 H3B 109.7 . . ? 
H3A C3 H3B 108.2 . . ? 
O3 C4 O4 125.8(6) . . ? 
O3 C4 C5 117.2(6) . . ? 
O4 C4 C5 117.0(6) . . ? 
C4 C5 C6 109.6(6) . . ? 
C4 C5 H5A 109.8 . . ? 
C6 C5 H5A 109.8 . . ? 
C4 C5 H5B 109.8 . . ? 
C6 C5 H5B 109.8 . . ? 
H5A C5 H5B 108.2 . . ? 
C5 C6 Cl2 111.5(5) . . ? 
C5 C6 H6A 109.3 . . ? 
Cl2 C6 H6A 109.3 . . ? 
C5 C6 H6B 109.3 . . ? 
Cl2 C6 H6B 109.3 . . ? 
H6A C6 H6B 108.0 . . ? 
O6 C7 O5 125.4(7) . . ? 
O6 C7 C8 117.1(6) . . ? 
O5 C7 C8 117.5(7) . . ? 
C9 C8 C7 110.8(7) . . ? 
C9 C8 H8A 109.5 . . ? 
C7 C8 H8A 109.5 . . ? 
C9 C8 H8B 109.5 . . ? 
C7 C8 H8B 109.5 . . ? 
H8A C8 H8B 108.1 . . ? 
C8 C9 Cl3 110.3(6) . . ? 
C8 C9 H9B 109.6 . . ? 
Cl3 C9 H9B 109.6 . . ? 
C8 C9 H9C 109.6 . . ? 
Cl3 C9 H9C 109.6 . . ? 
H9B C9 H9C 108.1 . . ? 
O8 C10 O7 125.8(6) . . ? 
O8 C10 C11 117.0(6) . . ? 
O7 C10 C11 117.2(6) . . ? 
C12 C11 C10 111.7(6) . . ? 
C12 C11 H11A 109.3 . . ? 
C10 C11 H11A 109.3 . . ? 
C12 C11 H11B 109.3 . . ? 
C10 C11 H11B 109.3 . . ? 
H11A C11 H11B 107.9 . . ? 
C11 C12 Cl4 110.8(5) . . ? 
C11 C12 H12A 109.5 . . ? 
Cl4 C12 H12A 109.5 . . ? 
C11 C12 H12B 109.5 . . ? 
Cl4 C12 H12B 109.5 . . ? 
H12A C12 H12B 108.1 . . ? 
O17 Rh3 O11 91.1(2) . . ? 
O17 Rh3 O13 89.7(2) . . ? 
O11 Rh3 O13 176.5(2) . . ? 
O17 Rh3 O15 177.7(2) . . ? 
O11 Rh3 O15 89.0(2) . . ? 
O13 Rh3 O15 90.0(2) . . ? 
O17 Rh3 O19 88.8(2) . . ? 
O11 Rh3 O19 89.49(19) . . ? 
O13 Rh3 O19 93.88(19) . . ? 
O15 Rh3 O19 93.5(2) . . ? 
O17 Rh3 Rh4 88.90(16) . . ? 
O11 Rh3 Rh4 88.12(15) . . ? 
O13 Rh3 Rh4 88.54(15) . . ? 
O15 Rh3 Rh4 88.77(15) . . ? 
O19 Rh3 Rh4 176.67(13) . . ? 
O16 Rh4 O18 175.7(2) . . ? 
O16 Rh4 O14 92.2(2) . . ? 
O18 Rh4 O14 87.6(2) . . ? 
O16 Rh4 O12 87.8(2) . . ? 
O18 Rh4 O12 92.2(2) . . ? 
O14 Rh4 O12 176.5(2) . . ? 
O16 Rh4 O20 87.4(2) . . ? 
O18 Rh4 O20 96.9(2) . . ? 
O14 Rh4 O20 91.2(2) . . ? 
O12 Rh4 O20 92.28(19) . . ? 
O16 Rh4 Rh3 87.79(15) . . ? 
O18 Rh4 Rh3 87.94(17) . . ? 
O14 Rh4 Rh3 88.32(14) . . ? 
O12 Rh4 Rh3 88.14(14) . . ? 
O20 Rh4 Rh3 175.15(14) . . ? 
C13 O11 Rh3 120.4(5) . . ? 
C13 O12 Rh4 118.2(4) . . ? 
C16 O13 Rh3 118.7(4) . . ? 
C16 O14 Rh4 118.2(5) . . ? 
C19 O15 Rh3 117.9(4) . . ? 
C19 O16 Rh4 119.6(5) . . ? 
C22 O17 Rh3 118.7(5) . . ? 
C22 O18 Rh4 117.5(5) . . ? 
Rh3 O19 H19A 128(6) . . ? 
Rh3 O19 H19B 94(6) . . ? 
H19A O19 H19B 106(4) . . ? 
O11 C13 O12 124.9(6) . . ? 
O11 C13 C14 117.4(7) . . ? 
O12 C13 C14 117.6(6) . . ? 
C13 C14 C15 112.1(6) . . ? 
C13 C14 H14A 109.2 . . ? 
C15 C14 H14A 109.2 . . ? 
C13 C14 H14B 109.2 . . ? 
C15 C14 H14B 109.2 . . ? 
H14A C14 H14B 107.9 . . ? 
C14 C15 Cl5 110.3(6) . . ? 
C14 C15 H15A 109.6 . . ? 
Cl5 C15 H15A 109.6 . . ? 
C14 C15 H15B 109.6 . . ? 
Cl5 C15 H15B 109.6 . . ? 
H15A C15 H15B 108.1 . . ? 
O13 C16 O14 126.1(6) . . ? 
O13 C16 C17 116.1(6) . . ? 
O14 C16 C17 117.7(6) . . ? 
C18 C17 C16 113.7(6) . . ? 
C18 C17 H17A 108.8 . . ? 
C16 C17 H17A 108.8 . . ? 
C18 C17 H17B 108.8 . . ? 
C16 C17 H17B 108.8 . . ? 
H17A C17 H17B 107.7 . . ? 
C17 C18 Cl6 110.5(5) . . ? 
C17 C18 H18A 109.5 . . ? 
Cl6 C18 H18A 109.5 . . ? 
C17 C18 H18B 109.5 . . ? 
Cl6 C18 H18B 109.5 . . ? 
H18A C18 H18B 108.1 . . ? 
O16 C19 O15 125.9(6) . . ? 
O16 C19 C20 116.6(7) . . ? 
O15 C19 C20 117.6(6) . . ? 
C21 C20 C19 112.7(7) . . ? 
C21 C20 H20B 109.0 . . ? 
C19 C20 H20B 109.0 . . ? 
C21 C20 H20C 109.0 . . ? 
C19 C20 H20C 109.0 . . ? 
H20B C20 H20C 107.8 . . ? 
C20 C21 Cl7 109.6(6) . . ? 
C20 C21 H21A 109.8 . . ? 
Cl7 C21 H21A 109.8 . . ? 
C20 C21 H21B 109.8 . . ? 
Cl7 C21 H21B 109.8 . . ? 
H21A C21 H21B 108.2 . . ? 
O17 C22 O18 126.5(7) . . ? 
O17 C22 C23 115.3(7) . . ? 
O18 C22 C23 118.2(7) . . ? 
C24 C23 C22 113.4(7) . . ? 
C24 C23 H23A 108.9 . . ? 
C22 C23 H23A 108.9 . . ? 
C24 C23 H23B 108.9 . . ? 
C22 C23 H23B 108.9 . . ? 
H23A C23 H23B 107.7 . . ? 
C23 C24 Cl8 110.7(6) . . ? 
C23 C24 H24A 109.5 . . ? 
Cl8 C24 H24A 109.5 . . ? 
C23 C24 H24B 109.5 . . ? 
Cl8 C24 H24B 109.5 . . ? 
H24A C24 H24B 108.1 . . ? 
O21 Rh5 O25 86.8(2) . . ? 
O21 Rh5 O27 93.8(2) . . ? 
O25 Rh5 O27 178.1(2) . . ? 
O21 Rh5 O23 176.0(2) . . ? 
O25 Rh5 O23 92.3(2) . . ? 
O27 Rh5 O23 86.9(2) . . ? 
O21 Rh5 O29 90.6(2) . . ? 
O25 Rh5 O29 92.6(2) . . ? 
O27 Rh5 O29 89.1(2) . . ? 
O23 Rh5 O29 93.3(2) . . ? 
O21 Rh5 Rh6 87.52(17) . . ? 
O25 Rh5 Rh6 89.73(19) . . ? 
O27 Rh5 Rh6 88.57(15) . . ? 
O23 Rh5 Rh6 88.56(15) . . ? 
O29 Rh5 Rh6 176.94(15) . . ? 
O24 Rh6 O26 91.6(2) . . ? 
O24 Rh6 O22 176.7(2) . . ? 
O26 Rh6 O22 87.8(2) . . ? 
O24 Rh6 O28 88.4(2) . . ? 
O26 Rh6 O28 175.2(2) . . ? 
O22 Rh6 O28 91.8(2) . . ? 
O24 Rh6 O30 83.3(2) . . ? 
O26 Rh6 O30 94.1(2) . . ? 
O22 Rh6 O30 100.0(2) . . ? 
O28 Rh6 O30 90.7(2) . . ? 
O24 Rh6 Rh5 87.86(15) . . ? 
O26 Rh6 Rh5 86.86(18) . . ? 
O22 Rh6 Rh5 88.85(18) . . ? 
O28 Rh6 Rh5 88.34(15) . . ? 
O30 Rh6 Rh5 171.14(13) . . ? 
C25 O21 Rh5 119.6(5) . . ? 
C25 O22 Rh6 116.8(5) . . ? 
C28 O23 Rh5 117.5(4) . . ? 
C28 O24 Rh6 121.0(5) . . ? 
C31 O25 Rh5 117.9(6) . . ? 
C31 O26 Rh6 119.6(5) . . ? 
C34 O27 Rh5 119.3(5) . . ? 
C34 O28 Rh6 117.1(5) . . ? 
Rh6 O30 H30A 108(6) . . ? 
Rh6 O30 H30D 123(6) . . ? 
H30A O30 H30D 106(4) . . ? 
O21 C25 O22 127.1(7) . . ? 
O21 C25 C26 115.6(8) . . ? 
O22 C25 C26 117.2(8) . . ? 
C27 C26 C25 115.1(8) . . ? 
C27 C26 H26A 108.5 . . ? 
C25 C26 H26A 108.5 . . ? 
C27 C26 H26B 108.5 . . ? 
C25 C26 H26B 108.5 . . ? 
H26A C26 H26B 107.5 . . ? 
C26 C27 Cl9 111.7(7) . . ? 
C26 C27 H27A 109.3 . . ? 
Cl9 C27 H27A 109.3 . . ? 
C26 C27 H27B 109.3 . . ? 
Cl9 C27 H27B 109.3 . . ? 
H27A C27 H27B 107.9 . . ? 
O24 C28 O23 125.1(6) . . ? 
O24 C28 C29 117.6(7) . . ? 
O23 C28 C29 117.3(6) . . ? 
C28 C29 C30 111.2(6) . . ? 
C28 C29 H29B 109.4 . . ? 
C30 C29 H29B 109.4 . . ? 
C28 C29 H29C 109.4 . . ? 
C30 C29 H29C 109.4 . . ? 
H29B C29 H29C 108.0 . . ? 
C29 C30 Cl10 110.2(5) . . ? 
C29 C30 H30B 109.6 . . ? 
Cl10 C30 H30B 109.6 . . ? 
C29 C30 H30C 109.6 . . ? 
Cl10 C30 H30C 109.6 . . ? 
H30B C30 H30C 108.1 . . ? 
O25 C31 O26 125.6(7) . . ? 
O25 C31 C32 113.7(8) . . ? 
O26 C31 C32 120.7(8) . . ? 
C33 C32 C31 111.0(9) . . ? 
C33 C32 H32A 109.4 . . ? 
C31 C32 H32A 109.4 . . ? 
C33 C32 H32B 109.4 . . ? 
C31 C32 H32B 109.4 . . ? 
H32A C32 H32B 108.0 . . ? 
C32 C33 Cl11 107.9(8) . . ? 
C32 C33 H33A 110.1 . . ? 
Cl11 C33 H33A 110.1 . . ? 
C32 C33 H33B 110.1 . . ? 
Cl11 C33 H33B 110.1 . . ? 
H33A C33 H33B 108.4 . . ? 
O27 C34 O28 126.4(7) . . ? 
O27 C34 C35 116.6(7) . . ? 
O28 C34 C35 116.8(7) . . ? 
C34 C35 C36 111.5(7) . . ? 
C34 C35 H35A 109.3 . . ? 
C36 C35 H35A 109.3 . . ? 
C34 C35 H35B 109.3 . . ? 
C36 C35 H35B 109.3 . . ? 
H35A C35 H35B 108.0 . . ? 
C35 C36 Cl12 109.6(6) . . ? 
C35 C36 H36A 109.8 . . ? 
Cl12 C36 H36A 109.8 . . ? 
C35 C36 H36B 109.8 . . ? 
Cl12 C36 H36B 109.8 . . ? 
H36A C36 H36B 108.2 . . ? 
O31 Rh7 O32 176.5(2) . 3_666 ? 
O31 Rh7 O34 91.5(2) . 3_666 ? 
O32 Rh7 O34 88.7(2) 3_666 3_666 ? 
O31 Rh7 O33 88.8(2) . . ? 
O32 Rh7 O33 90.8(2) 3_666 . ? 
O34 Rh7 O33 176.5(2) 3_666 . ? 
O31 Rh7 O35 89.9(2) . . ? 
O32 Rh7 O35 93.6(2) 3_666 . ? 
O34 Rh7 O35 90.4(2) 3_666 . ? 
O33 Rh7 O35 93.1(2) . . ? 
O31 Rh7 Rh7 88.04(15) . 3_666 ? 
O32 Rh7 Rh7 88.49(15) 3_666 3_666 ? 
O34 Rh7 Rh7 87.11(14) 3_666 3_666 ? 
O33 Rh7 Rh7 89.39(14) . 3_666 ? 
O35 Rh7 Rh7 176.74(16) . 3_666 ? 
C37 O31 Rh7 119.1(5) . . ? 
C37 O32 Rh7 118.8(4) . 3_666 ? 
C40 O33 Rh7 117.6(5) . . ? 
C40 O34 Rh7 120.1(5) . 3_666 ? 
O32 C37 O31 125.5(7) . . ? 
O32 C37 C38 118.4(6) . . ? 
O31 C37 C38 116.1(7) . . ? 
C37 C38 C39 112.1(7) . . ? 
C37 C38 H38A 109.2 . . ? 
C39 C38 H38A 109.2 . . ? 
C37 C38 H38B 109.2 . . ? 
C39 C38 H38B 109.2 . . ? 
H38A C38 H38B 107.9 . . ? 
C38 C39 Cl13 111.1(6) . . ? 
C38 C39 H39A 109.4 . . ? 
Cl13 C39 H39A 109.4 . . ? 
C38 C39 H39B 109.4 . . ? 
Cl13 C39 H39B 109.4 . . ? 
H39A C39 H39B 108.0 . . ? 
O34 C40 O33 125.8(7) . . ? 
O34 C40 C41 116.3(6) . . ? 
O33 C40 C41 117.9(7) . . ? 
C40 C41 C42 113.5(6) . . ? 
C40 C41 H41A 108.9 . . ? 
C42 C41 H41A 108.9 . . ? 
C40 C41 H41B 108.9 . . ? 
C42 C41 H41B 108.9 . . ? 
H41A C41 H41B 107.7 . . ? 
C41 C42 Cl14 110.0(5) . . ? 
C41 C42 H42A 109.7 . . ? 
Cl14 C42 H42A 109.7 . . ? 
C41 C42 H42B 109.7 . . ? 
Cl14 C42 H42B 109.7 . . ? 
H42A C42 H42B 108.2 . . ? 
O37 Rh8 O39 87.2(2) 3_656 3_656 ? 
O37 Rh8 O38 92.6(2) 3_656 . ? 
O39 Rh8 O38 176.07(19) 3_656 . ? 
O37 Rh8 O36 176.4(2) 3_656 . ? 
O39 Rh8 O36 92.1(2) 3_656 . ? 
O38 Rh8 O36 87.8(2) . . ? 
O37 Rh8 O40 90.8(2) 3_656 . ? 
O39 Rh8 O40 91.66(19) 3_656 . ? 
O38 Rh8 O40 92.27(19) . . ? 
O36 Rh8 O40 92.8(2) . . ? 
O37 Rh8 Rh8 88.11(14) 3_656 3_656 ? 
O39 Rh8 Rh8 88.05(14) 3_656 3_656 ? 
O38 Rh8 Rh8 88.02(13) . 3_656 ? 
O36 Rh8 Rh8 88.33(14) . 3_656 ? 
O40 Rh8 Rh8 178.86(14) . 3_656 ? 
C43 O36 Rh8 119.0(5) . . ? 
C43 O37 Rh8 119.4(4) . 3_656 ? 
C46 O38 Rh8 118.8(4) . . ? 
C46 O39 Rh8 120.0(4) . 3_656 ? 
Rh8 O40 H40A 115(6) . . ? 
Rh8 O40 H40B 118(6) . . ? 
H40A O40 H40B 103(4) . . ? 
O36 C43 O37 125.1(7) . . ? 
O36 C43 C44 119.6(6) . . ? 
O37 C43 C44 115.3(6) . . ? 
C43 C44 C45 113.3(6) . . ? 
C43 C44 H44A 108.9 . . ? 
C45 C44 H44A 108.9 . . ? 
C43 C44 H44B 108.9 . . ? 
C45 C44 H44B 108.9 . . ? 
H44A C44 H44B 107.7 . . ? 
C44 C45 Cl15 110.8(6) . . ? 
C44 C45 H45A 109.5 . . ? 
Cl15 C45 H45A 109.5 . . ? 
C44 C45 H45B 109.5 . . ? 
Cl15 C45 H45B 109.5 . . ? 
H45A C45 H45B 108.1 . . ? 
O39 C46 O38 125.1(6) . . ? 
O39 C46 C47 118.3(6) . . ? 
O38 C46 C47 116.5(6) . . ? 
C46 C47 C48 109.5(6) . . ? 
C46 C47 H47A 109.8 . . ? 
C48 C47 H47A 109.8 . . ? 
C46 C47 H47B 109.8 . . ? 
C48 C47 H47B 109.8 . . ? 
H47A C47 H47B 108.2 . . ? 
C47 C48 Cl16 110.0(5) . . ? 
C47 C48 H48A 109.7 . . ? 
Cl16 C48 H48A 109.7 . . ? 
C47 C48 H48B 109.7 . . ? 
Cl16 C48 H48B 109.7 . . ? 
H48A C48 H48B 108.2 . . ? 
 
loop_ 
 _geom_torsion_atom_site_label_1 
 _geom_torsion_atom_site_label_2 
 _geom_torsion_atom_site_label_3 
 _geom_torsion_atom_site_label_4 
 _geom_torsion 
 _geom_torsion_site_symmetry_1 
 _geom_torsion_site_symmetry_2 
 _geom_torsion_site_symmetry_3 
 _geom_torsion_site_symmetry_4 
 _geom_torsion_publ_flag 
O3 Rh1 Rh2 O8 -88.5(2) . . . . ? 
O5 Rh1 Rh2 O8 -179.0(2) . . . . ? 
O1 Rh1 Rh2 O8 92.2(2) . . . . ? 
O7 Rh1 Rh2 O8 0.5(2) . . . . ? 
O9 Rh1 Rh2 O8 50(3) . . . . ? 
O3 Rh1 Rh2 O2 -179.2(2) . . . . ? 
O5 Rh1 Rh2 O2 90.3(2) . . . . ? 
O1 Rh1 Rh2 O2 1.5(2) . . . . ? 
O7 Rh1 Rh2 O2 -90.2(2) . . . . ? 
O9 Rh1 Rh2 O2 -40(3) . . . . ? 
O3 Rh1 Rh2 O6 92.1(2) . . . . ? 
O5 Rh1 Rh2 O6 1.6(2) . . . . ? 
O1 Rh1 Rh2 O6 -87.2(2) . . . . ? 
O7 Rh1 Rh2 O6 -178.9(2) . . . . ? 
O9 Rh1 Rh2 O6 -129(3) . . . . ? 
O3 Rh1 Rh2 O4 0.1(2) . . . . ? 
O5 Rh1 Rh2 O4 -90.3(2) . . . . ? 
O1 Rh1 Rh2 O4 -179.1(2) . . . . ? 
O7 Rh1 Rh2 O4 89.2(2) . . . . ? 
O9 Rh1 Rh2 O4 139(3) . . . . ? 
O3 Rh1 Rh2 O10 -36(14) . . . . ? 
O5 Rh1 Rh2 O10 -126(14) . . . . ? 
O1 Rh1 Rh2 O10 145(14) . . . . ? 
O7 Rh1 Rh2 O10 53(14) . . . . ? 
O9 Rh1 Rh2 O10 103(14) . . . . ? 
O3 Rh1 O1 C1 -10(3) . . . . ? 
O5 Rh1 O1 C1 -88.5(5) . . . . ? 
O7 Rh1 O1 C1 88.1(5) . . . . ? 
O9 Rh1 O1 C1 178.7(5) . . . . ? 
Rh2 Rh1 O1 C1 0.4(5) . . . . ? 
O8 Rh2 O2 C1 -92.3(6) . . . . ? 
O6 Rh2 O2 C1 83.4(6) . . . . ? 
O4 Rh2 O2 C1 -16(4) . . . . ? 
O10 Rh2 O2 C1 176.4(6) . . . . ? 
Rh1 Rh2 O2 C1 -4.0(6) . . . . ? 
O5 Rh1 O3 C4 91.3(5) . . . . ? 
O1 Rh1 O3 C4 13(3) . . . . ? 
O7 Rh1 O3 C4 -85.3(5) . . . . ? 
O9 Rh1 O3 C4 -175.8(5) . . . . ? 
Rh2 Rh1 O3 C4 2.5(5) . . . . ? 
O8 Rh2 O4 C4 85.5(5) . . . . ? 
O2 Rh2 O4 C4 9(4) . . . . ? 
O6 Rh2 O4 C4 -90.2(5) . . . . ? 
O10 Rh2 O4 C4 176.8(5) . . . . ? 
Rh1 Rh2 O4 C4 -2.8(5) . . . . ? 
O3 Rh1 O5 C7 -92.6(6) . . . . ? 
O1 Rh1 O5 C7 83.4(5) . . . . ? 
O7 Rh1 O5 C7 -13(4) . . . . ? 
O9 Rh1 O5 C7 174.1(5) . . . . ? 
Rh2 Rh1 O5 C7 -4.0(5) . . . . ? 
O8 Rh2 O6 C7 -8(3) . . . . ? 
O2 Rh2 O6 C7 -88.9(6) . . . . ? 
O4 Rh2 O6 C7 88.0(6) . . . . ? 
O10 Rh2 O6 C7 179.6(6) . . . . ? 
Rh1 Rh2 O6 C7 0.1(6) . . . . ? 
O3 Rh1 O7 C10 86.7(5) . . . . ? 
O5 Rh1 O7 C10 7(4) . . . . ? 
O1 Rh1 O7 C10 -89.2(5) . . . . ? 
O9 Rh1 O7 C10 180.0(5) . . . . ? 
Rh2 Rh1 O7 C10 -2.0(5) . . . . ? 
O2 Rh2 O8 C10 89.8(5) . . . . ? 
O6 Rh2 O8 C10 9(3) . . . . ? 
O4 Rh2 O8 C10 -87.1(5) . . . . ? 
O10 Rh2 O8 C10 -178.6(5) . . . . ? 
Rh1 Rh2 O8 C10 0.9(5) . . . . ? 
Rh2 O2 C1 O1 5.7(10) . . . . ? 
Rh2 O2 C1 C2 -175.3(6) . . . . ? 
Rh1 O1 C1 O2 -3.8(10) . . . . ? 
Rh1 O1 C1 C2 177.1(6) . . . . ? 
O2 C1 C2 C3 159.0(8) . . . . ? 
O1 C1 C2 C3 -21.9(11) . . . . ? 
C1 C2 C3 Cl1 -166.0(6) . . . . ? 
Rh1 O3 C4 O4 -5.8(10) . . . . ? 
Rh1 O3 C4 C5 171.6(5) . . . . ? 
Rh2 O4 C4 O3 6.0(10) . . . . ? 
Rh2 O4 C4 C5 -171.5(5) . . . . ? 
O3 C4 C5 C6 -103.3(8) . . . . ? 
O4 C4 C5 C6 74.4(8) . . . . ? 
C4 C5 C6 Cl2 58.8(7) . . . . ? 
Rh2 O6 C7 O5 -3.5(11) . . . . ? 
Rh2 O6 C7 C8 176.8(5) . . . . ? 
Rh1 O5 C7 O6 5.4(10) . . . . ? 
Rh1 O5 C7 C8 -174.9(5) . . . . ? 
O6 C7 C8 C9 -67.1(9) . . . . ? 
O5 C7 C8 C9 113.3(8) . . . . ? 
C7 C8 C9 Cl3 -60.3(8) . . . . ? 
Rh2 O8 C10 O7 -2.8(9) . . . . ? 
Rh2 O8 C10 C11 -179.4(4) . . . . ? 
Rh1 O7 C10 O8 3.4(9) . . . . ? 
Rh1 O7 C10 C11 180.0(5) . . . . ? 
O8 C10 C11 C12 -20.2(9) . . . . ? 
O7 C10 C11 C12 162.9(6) . . . . ? 
C10 C11 C12 Cl4 167.9(5) . . . . ? 
O17 Rh3 Rh4 O16 -178.8(2) . . . . ? 
O11 Rh3 Rh4 O16 -87.6(2) . . . . ? 
O13 Rh3 Rh4 O16 91.5(2) . . . . ? 
O15 Rh3 Rh4 O16 1.5(2) . . . . ? 
O19 Rh3 Rh4 O16 -132(2) . . . . ? 
O17 Rh3 Rh4 O18 1.4(2) . . . . ? 
O11 Rh3 Rh4 O18 92.5(2) . . . . ? 
O13 Rh3 Rh4 O18 -88.3(2) . . . . ? 
O15 Rh3 Rh4 O18 -178.4(2) . . . . ? 
O19 Rh3 Rh4 O18 48(2) . . . . ? 
O17 Rh3 Rh4 O14 89.0(2) . . . . ? 
O11 Rh3 Rh4 O14 -179.8(2) . . . . ? 
O13 Rh3 Rh4 O14 -0.7(2) . . . . ? 
O15 Rh3 Rh4 O14 -90.8(2) . . . . ? 
O19 Rh3 Rh4 O14 136(2) . . . . ? 
O17 Rh3 Rh4 O12 -90.9(2) . . . . ? 
O11 Rh3 Rh4 O12 0.2(2) . . . . ? 
O13 Rh3 Rh4 O12 179.3(2) . . . . ? 
O15 Rh3 Rh4 O12 89.3(2) . . . . ? 
O19 Rh3 Rh4 O12 -44(2) . . . . ? 
O17 Rh3 Rh4 O20 173.9(16) . . . . ? 
O11 Rh3 Rh4 O20 -94.9(16) . . . . ? 
O13 Rh3 Rh4 O20 84.2(16) . . . . ? 
O15 Rh3 Rh4 O20 -5.9(16) . . . . ? 
O19 Rh3 Rh4 O20 -139(3) . . . . ? 
O17 Rh3 O11 C13 91.2(6) . . . . ? 
O13 Rh3 O11 C13 -13(4) . . . . ? 
O15 Rh3 O11 C13 -86.4(6) . . . . ? 
O19 Rh3 O11 C13 -179.9(6) . . . . ? 
Rh4 Rh3 O11 C13 2.4(6) . . . . ? 
O16 Rh4 O12 C13 85.1(5) . . . . ? 
O18 Rh4 O12 C13 -90.7(5) . . . . ? 
O14 Rh4 O12 C13 -4(4) . . . . ? 
O20 Rh4 O12 C13 172.4(5) . . . . ? 
Rh3 Rh4 O12 C13 -2.8(5) . . . . ? 
O17 Rh3 O13 C16 -85.9(5) . . . . ? 
O11 Rh3 O13 C16 18(4) . . . . ? 
O15 Rh3 O13 C16 91.7(5) . . . . ? 
O19 Rh3 O13 C16 -174.7(5) . . . . ? 
Rh4 Rh3 O13 C16 3.0(5) . . . . ? 
O16 Rh4 O14 C16 -89.0(5) . . . . ? 
O18 Rh4 O14 C16 86.7(5) . . . . ? 
O12 Rh4 O14 C16 0(4) . . . . ? 
O20 Rh4 O14 C16 -176.5(5) . . . . ? 
Rh3 Rh4 O14 C16 -1.3(5) . . . . ? 
O17 Rh3 O15 C19 -8(5) . . . . ? 
O11 Rh3 O15 C19 85.6(5) . . . . ? 
O13 Rh3 O15 C19 -91.1(5) . . . . ? 
O19 Rh3 O15 C19 175.0(5) . . . . ? 
Rh4 Rh3 O15 C19 -2.6(5) . . . . ? 
O18 Rh4 O16 C19 1(3) . . . . ? 
O14 Rh4 O16 C19 87.4(5) . . . . ? 
O12 Rh4 O16 C19 -89.1(5) . . . . ? 
O20 Rh4 O16 C19 178.6(5) . . . . ? 
Rh3 Rh4 O16 C19 -0.8(5) . . . . ? 
O11 Rh3 O17 C22 -93.2(5) . . . . ? 
O13 Rh3 O17 C22 83.4(5) . . . . ? 
O15 Rh3 O17 C22 1(5) . . . . ? 
O19 Rh3 O17 C22 177.3(5) . . . . ? 
Rh4 Rh3 O17 C22 -5.1(5) . . . . ? 
O16 Rh4 O18 C22 0(3) . . . . ? 
O14 Rh4 O18 C22 -86.5(5) . . . . ? 
O12 Rh4 O18 C22 89.9(5) . . . . ? 
O20 Rh4 O18 C22 -177.5(5) . . . . ? 
Rh3 Rh4 O18 C22 1.9(5) . . . . ? 
Rh3 O11 C13 O12 -5.5(10) . . . . ? 
Rh3 O11 C13 C14 171.0(5) . . . . ? 
Rh4 O12 C13 O11 5.7(10) . . . . ? 
Rh4 O12 C13 C14 -170.8(5) . . . . ? 
O11 C13 C14 C15 26.0(10) . . . . ? 
O12 C13 C14 C15 -157.2(7) . . . . ? 
C13 C14 C15 Cl5 72.5(8) . . . . ? 
Rh3 O13 C16 O14 -5.1(9) . . . . ? 
Rh3 O13 C16 C17 177.5(5) . . . . ? 
Rh4 O14 C16 O13 4.3(9) . . . . ? 
Rh4 O14 C16 C17 -178.4(5) . . . . ? 
O13 C16 C17 C18 -167.0(6) . . . . ? 
O14 C16 C17 C18 15.4(9) . . . . ? 
C16 C17 C18 Cl6 -173.2(5) . . . . ? 
Rh4 O16 C19 O15 -1.1(10) . . . . ? 
Rh4 O16 C19 C20 179.4(5) . . . . ? 
Rh3 O15 C19 O16 2.8(10) . . . . ? 
Rh3 O15 C19 C20 -177.6(5) . . . . ? 
O16 C19 C20 C21 -114.1(8) . . . . ? 
O15 C19 C20 C21 66.3(9) . . . . ? 
C19 C20 C21 Cl7 57.9(9) . . . . ? 
Rh3 O17 C22 O18 8.6(10) . . . . ? 
Rh3 O17 C22 C23 -171.6(5) . . . . ? 
Rh4 O18 C22 O17 -6.9(10) . . . . ? 
Rh4 O18 C22 C23 173.3(5) . . . . ? 
O17 C22 C23 C24 135.5(7) . . . . ? 
O18 C22 C23 C24 -44.8(10) . . . . ? 
C22 C23 C24 Cl8 -56.6(9) . . . . ? 
O21 Rh5 Rh6 O24 178.7(2) . . . . ? 
O25 Rh5 Rh6 O24 91.9(2) . . . . ? 
O27 Rh5 Rh6 O24 -87.4(2) . . . . ? 
O23 Rh5 Rh6 O24 -0.4(2) . . . . ? 
O29 Rh5 Rh6 O24 -129(2) . . . . ? 
O21 Rh5 Rh6 O26 86.9(2) . . . . ? 
O25 Rh5 Rh6 O26 0.1(2) . . . . ? 
O27 Rh5 Rh6 O26 -179.1(2) . . . . ? 
O23 Rh5 Rh6 O26 -92.2(2) . . . . ? 
O29 Rh5 Rh6 O26 139(2) . . . . ? 
O21 Rh5 Rh6 O22 -0.9(2) . . . . ? 
O25 Rh5 Rh6 O22 -87.8(2) . . . . ? 
O27 Rh5 Rh6 O22 93.0(2) . . . . ? 
O23 Rh5 Rh6 O22 180.0(2) . . . . ? 
O29 Rh5 Rh6 O22 51(2) . . . . ? 
O21 Rh5 Rh6 O28 -92.8(2) . . . . ? 
O25 Rh5 Rh6 O28 -179.6(2) . . . . ? 
O27 Rh5 Rh6 O28 1.1(2) . . . . ? 
O23 Rh5 Rh6 O28 88.1(2) . . . . ? 
O29 Rh5 Rh6 O28 -40(2) . . . . ? 
O21 Rh5 Rh6 O30 -176.8(10) . . . . ? 
O25 Rh5 Rh6 O30 96.4(10) . . . . ? 
O27 Rh5 Rh6 O30 -82.9(10) . . . . ? 
O23 Rh5 Rh6 O30 4.1(10) . . . . ? 
O29 Rh5 Rh6 O30 -124(3) . . . . ? 
O25 Rh5 O21 C25 89.5(5) . . . . ? 
O27 Rh5 O21 C25 -88.7(5) . . . . ? 
O23 Rh5 O21 C25 12(3) . . . . ? 
O29 Rh5 O21 C25 -177.9(5) . . . . ? 
Rh6 Rh5 O21 C25 -0.3(5) . . . . ? 
O24 Rh6 O22 C25 -4(4) . . . . ? 
O26 Rh6 O22 C25 -84.5(6) . . . . ? 
O28 Rh6 O22 C25 90.7(5) . . . . ? 
O30 Rh6 O22 C25 -178.2(5) . . . . ? 
Rh5 Rh6 O22 C25 2.4(5) . . . . ? 
O21 Rh5 O23 C28 -13(3) . . . . ? 
O25 Rh5 O23 C28 -89.5(5) . . . . ? 
O27 Rh5 O23 C28 88.8(5) . . . . ? 
O29 Rh5 O23 C28 177.8(5) . . . . ? 
Rh6 Rh5 O23 C28 0.2(5) . . . . ? 
O26 Rh6 O24 C28 87.6(6) . . . . ? 
O22 Rh6 O24 C28 7(5) . . . . ? 
O28 Rh6 O24 C28 -87.6(6) . . . . ? 
O30 Rh6 O24 C28 -178.5(6) . . . . ? 
Rh5 Rh6 O24 C28 0.8(6) . . . . ? 
O21 Rh5 O25 C31 -84.4(6) . . . . ? 
O27 Rh5 O25 C31 28(7) . . . . ? 
O23 Rh5 O25 C31 91.7(6) . . . . ? 
O29 Rh5 O25 C31 -174.8(6) . . . . ? 
Rh6 Rh5 O25 C31 3.2(6) . . . . ? 
O24 Rh6 O26 C31 -91.1(6) . . . . ? 
O22 Rh6 O26 C31 85.6(6) . . . . ? 
O28 Rh6 O26 C31 0(3) . . . . ? 
O30 Rh6 O26 C31 -174.5(6) . . . . ? 
Rh5 Rh6 O26 C31 -3.3(6) . . . . ? 
O21 Rh5 O27 C34 88.2(5) . . . . ? 
O25 Rh5 O27 C34 -24(7) . . . . ? 
O23 Rh5 O27 C34 -87.8(5) . . . . ? 
O29 Rh5 O27 C34 178.8(5) . . . . ? 
Rh6 Rh5 O27 C34 0.8(5) . . . . ? 
O24 Rh6 O28 C34 84.5(5) . . . . ? 
O26 Rh6 O28 C34 -7(3) . . . . ? 
O22 Rh6 O28 C34 -92.2(5) . . . . ? 
O30 Rh6 O28 C34 167.8(5) . . . . ? 
Rh5 Rh6 O28 C34 -3.4(5) . . . . ? 
Rh5 O21 C25 O22 2.6(10) . . . . ? 
Rh5 O21 C25 C26 -177.1(5) . . . . ? 
Rh6 O22 C25 O21 -3.6(10) . . . . ? 
Rh6 O22 C25 C26 176.1(5) . . . . ? 
O21 C25 C26 C27 122.7(9) . . . . ? 
O22 C25 C26 C27 -57.0(11) . . . . ? 
C25 C26 C27 Cl9 -54.8(11) . . . . ? 
Rh6 O24 C28 O23 -0.9(11) . . . . ? 
Rh6 O24 C28 C29 -178.8(5) . . . . ? 
Rh5 O23 C28 O24 0.4(10) . . . . ? 
Rh5 O23 C28 C29 178.3(5) . . . . ? 
O24 C28 C29 C30 -21.8(10) . . . . ? 
O23 C28 C29 C30 160.2(7) . . . . ? 
C28 C29 C30 Cl10 155.6(6) . . . . ? 
Rh5 O25 C31 O26 -7.0(11) . . . . ? 
Rh5 O25 C31 C32 172.7(5) . . . . ? 
Rh6 O26 C31 O25 7.2(11) . . . . ? 
Rh6 O26 C31 C32 -172.5(6) . . . . ? 
O25 C31 C32 C33 163.6(9) . . . . ? 
O26 C31 C32 C33 -16.6(12) . . . . ? 
C31 C32 C33 Cl11 -177.7(7) . . . . ? 
Rh5 O27 C34 O28 -4.1(10) . . . . ? 
Rh5 O27 C34 C35 171.8(5) . . . . ? 
Rh6 O28 C34 O27 5.4(10) . . . . ? 
Rh6 O28 C34 C35 -170.6(5) . . . . ? 
O27 C34 C35 C36 -114.0(8) . . . . ? 
O28 C34 C35 C36 62.3(9) . . . . ? 
C34 C35 C36 Cl12 55.6(8) . . . . ? 
O32 Rh7 O31 C37 -5(4) 3_666 . . . ? 
O34 Rh7 O31 C37 88.1(5) 3_666 . . . ? 
O33 Rh7 O31 C37 -88.4(5) . . . . ? 
O35 Rh7 O31 C37 178.5(5) . . . . ? 
Rh7 Rh7 O31 C37 1.0(5) 3_666 . . . ? 
O31 Rh7 O33 C40 88.1(5) . . . . ? 
O32 Rh7 O33 C40 -88.4(5) 3_666 . . . ? 
O34 Rh7 O33 C40 -8(4) 3_666 . . . ? 
O35 Rh7 O33 C40 178.0(5) . . . . ? 
Rh7 Rh7 O33 C40 0.1(5) 3_666 . . . ? 
Rh7 O32 C37 O31 3.4(10) 3_666 . . . ? 
Rh7 O32 C37 C38 -174.4(5) 3_666 . . . ? 
Rh7 O31 C37 O32 -2.9(10) . . . . ? 
Rh7 O31 C37 C38 174.9(5) . . . . ? 
O32 C37 C38 C39 123.6(8) . . . . ? 
O31 C37 C38 C39 -54.4(9) . . . . ? 
C37 C38 C39 Cl13 -52.2(8) . . . . ? 
Rh7 O34 C40 O33 1.8(10) 3_666 . . . ? 
Rh7 O34 C40 C41 -176.9(5) 3_666 . . . ? 
Rh7 O33 C40 O34 -1.1(10) . . . . ? 
Rh7 O33 C40 C41 177.5(5) . . . . ? 
O34 C40 C41 C42 -166.2(7) . . . . ? 
O33 C40 C41 C42 15.0(10) . . . . ? 
C40 C41 C42 Cl14 -161.1(6) . . . . ? 
O37 Rh8 O36 C43 -10(4) 3_656 . . . ? 
O39 Rh8 O36 C43 -89.6(5) 3_656 . . . ? 
O38 Rh8 O36 C43 86.5(5) . . . . ? 
O40 Rh8 O36 C43 178.6(5) . . . . ? 
Rh8 Rh8 O36 C43 -1.6(5) 3_656 . . . ? 
O37 Rh8 O38 C46 89.0(5) 3_656 . . . ? 
O39 Rh8 O38 C46 1(3) 3_656 . . . ? 
O36 Rh8 O38 C46 -87.4(5) . . . . ? 
O40 Rh8 O38 C46 179.9(5) . . . . ? 
Rh8 Rh8 O38 C46 1.0(5) 3_656 . . . ? 
Rh8 O36 C43 O37 2.4(9) . . . . ? 
Rh8 O36 C43 C44 -176.4(5) . . . . ? 
Rh8 O37 C43 O36 -1.8(9) 3_656 . . . ? 
Rh8 O37 C43 C44 177.1(5) 3_656 . . . ? 
O36 C43 C44 C45 24.1(10) . . . . ? 
O37 C43 C44 C45 -154.9(7) . . . . ? 
C43 C44 C45 Cl15 69.3(8) . . . . ? 
Rh8 O39 C46 O38 2.1(10) 3_656 . . . ? 
Rh8 O39 C46 C47 -175.3(5) 3_656 . . . ? 
Rh8 O38 C46 O39 -2.1(9) . . . . ? 
Rh8 O38 C46 C47 175.3(4) . . . . ? 
O39 C46 C47 C48 74.6(8) . . . . ? 
O38 C46 C47 C48 -103.0(7) . . . . ? 
C46 C47 C48 Cl16 -177.6(5) . . . . ? 
 
_diffrn_measured_fraction_theta_max    0.993 
_diffrn_reflns_theta_full              31.55 
_diffrn_measured_fraction_theta_full   0.993 
_refine_diff_density_max    4.512 
_refine_diff_density_min   -2.985 
_refine_diff_density_rms    0.212 
